# Supplementary material for: Direct carbon capture for the production of high-performance biodegradable plastics by cyanobacterial cell factories
Source: Royal Society of Chemistry journal article supplement (doi:10.1039/d1gc04188f), 2022-01-01
Supplement: d1gc04188f1.pdf [file d1gc04188f1.pdf]

Electronic Supplementary Information

**Direct carbon capture for production of high-performance  
biodegradable plastics by cyanobacterial cell factory**

Chunlin Tan, Fei Tao\* and Ping Xu\*

The State Key Laboratory of Microbial Metabolism, Joint International Research  
Laboratory of Metabolic and Developmental Sciences and School of Life Sciences  
and Biotechnology, Shanghai Jiao Tong University, Shanghai, China

\*Corresponding author: Prof. Dr. Fei Tao or Prof. Dr. Ping Xu; Mailing address:

School of Life Sciences & Biotechnology, Shanghai Jiao Tong University, Shanghai  
200240, P. R. China; E-mail: [taofei@sjtu.edu.cn](mailto:taofei@sjtu.edu.cn); [pingxu@sjtu.edu.cn](mailto:pingxu@sjtu.edu.cn); Tel: +86-21-  
34204066; Fax: +86-21-34206723

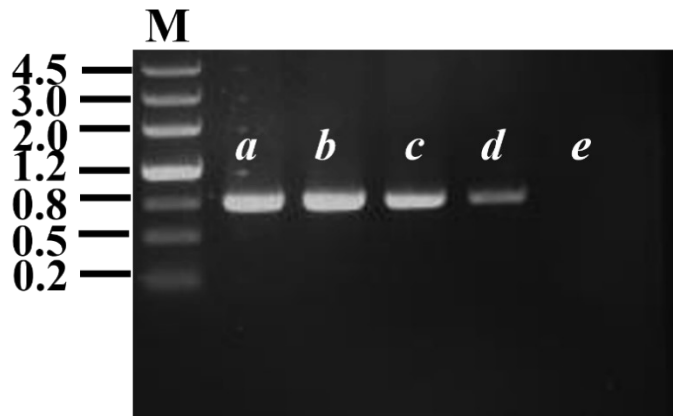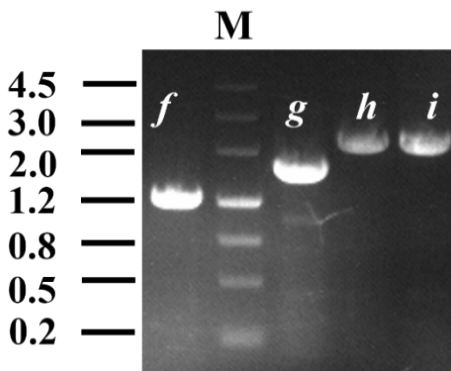

**Fig. S1** Colony PCR results with the gene-specific primers confirming the integration of foreign genes in engineered cyanobacteria. The number of “a” to “i” represents the target gene, respectively: *asackA*, *asfabF*, *asfabH*, *asaccC*, wild type, *ldhD*, *pha*, *pct* and *acsA*.

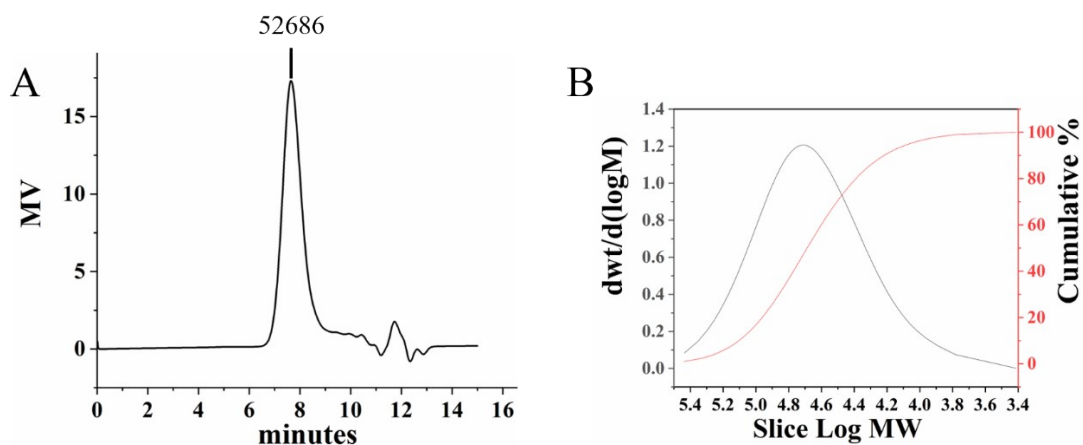

|   | Distribution Name | Mn (Daltons) | Mw (Daltons) | MP (Daltons) | Mz (Daltons) | Mz+1 (Daltons) | Polydispersity | Mz/Mw    | Mz+1/Mw  |
|---|-------------------|--------------|--------------|--------------|--------------|----------------|----------------|----------|----------|
| 1 |                   | 32765        | 62492        | 52686        | 108363       | 173940         | 1.907246       | 1.734045 | 2.783411 |

**Fig. S2** Gel Permeation Chromatography (GPC) analysis of the extracted PLA polymer sample. (A) PLA was analyzed with chloroform system. (B) The relative distribution plots and table.

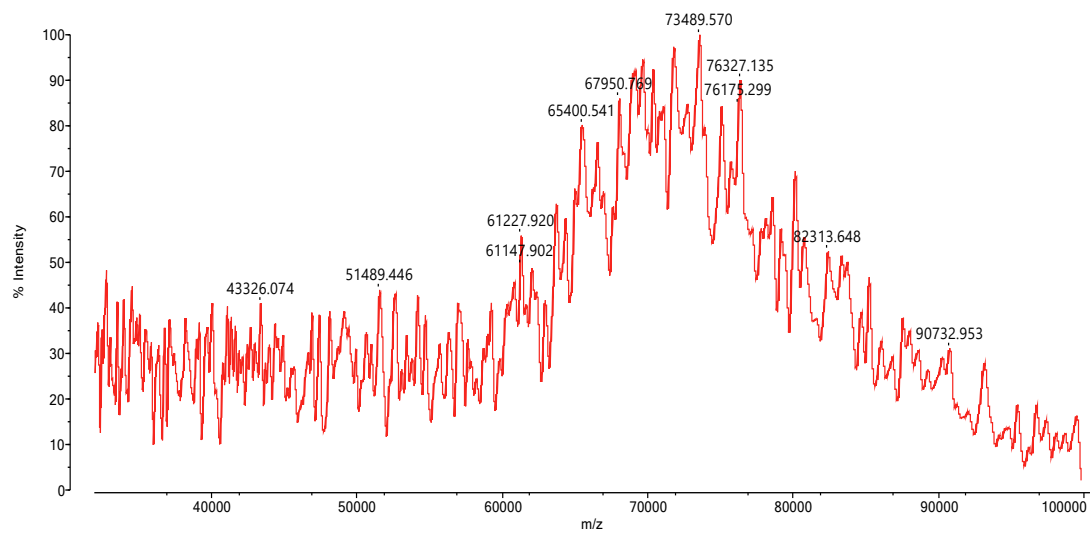

**Fig. S3** MALDI-TOF mass spectrum (matrix: DCTB; ionization salt:  $\text{CF}_3\text{CO}_2\text{Na}$ ; solvent: chloroform) of PLA obtained from the extracted polymer sample.

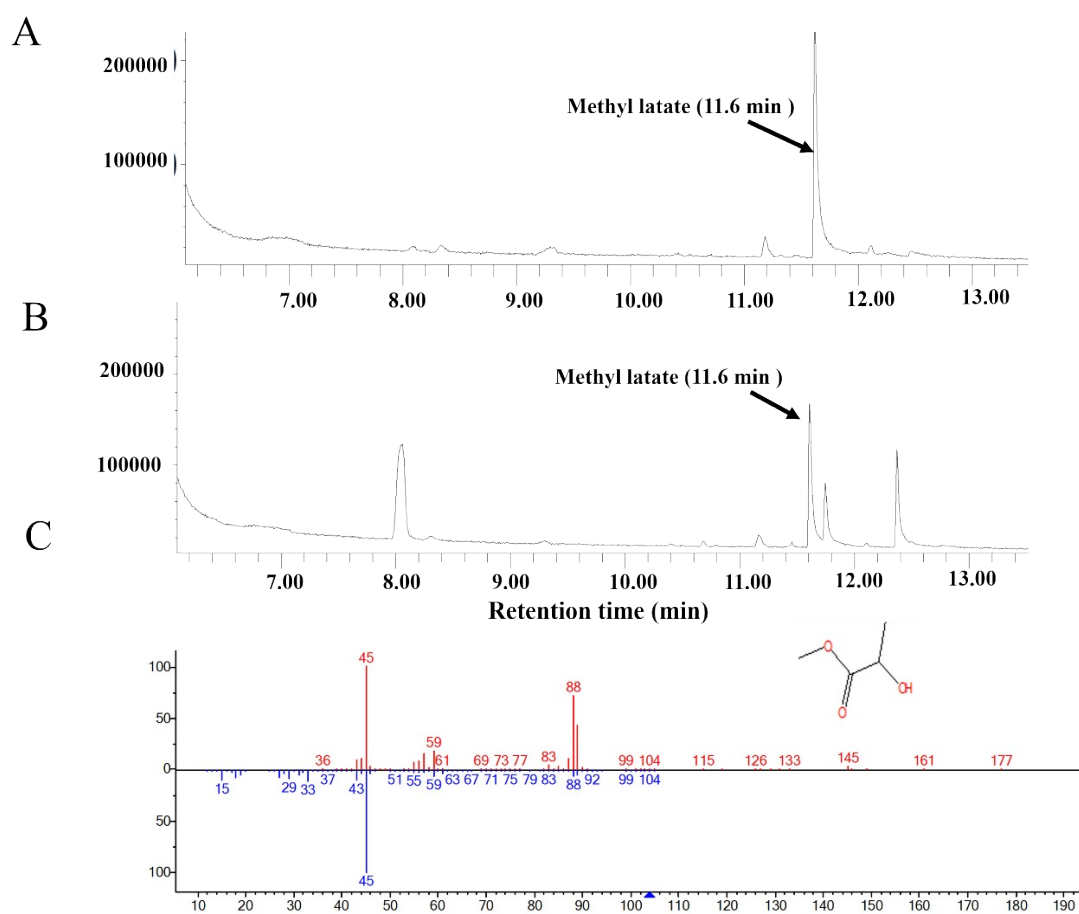

**Fig. S4** GC-MS analysis of the methyl lactate (A) The methyl lactate standard substance and (B) culture of the recombinant strain PYLW01. The retention time of methyl lactate was 11.6 min. (C) The mass spectra of the recombinant strain PYLW01 and authentic standard.

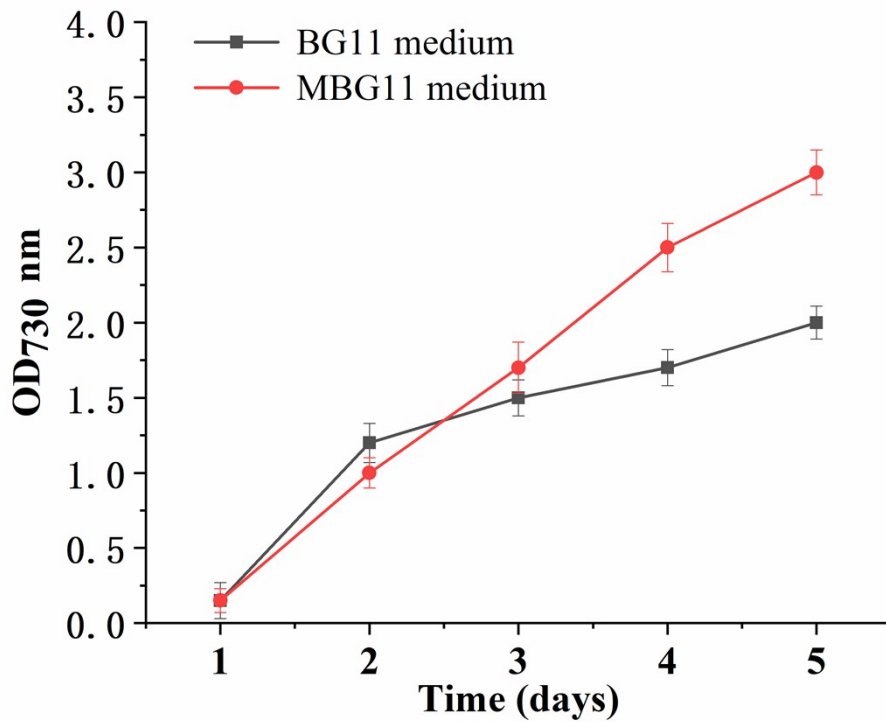

**Fig. S5** Effect of medium on the growth of the recombinant PYLW07 strain. The PYLW07 strain was cultured in BG11 medium and MBG11 medium at 30°C with a light intensity of 150 $\mu\text{mol m}^2\text{s}^{-1}$ . MBG11 medium: BG11 medium enriched with 0.2 g/L NaCO<sub>3</sub>, 5 g/L MgSO<sub>4</sub>·7H<sub>2</sub>O, 5 g/L NaNO<sub>3</sub>, 2 mM KH<sub>2</sub>PO<sub>4</sub>. Error bars indicate SD (n = 3).

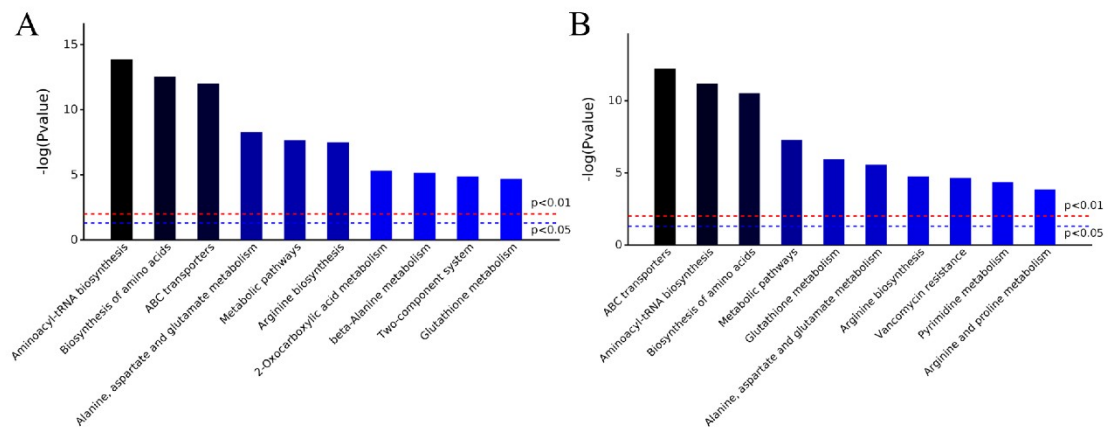

**Fig. S6** The analysis of significant differences between different metabolic pathways. (A) The differences between strains T7942 and TPLA. (B) The differences between strains TPLA and TPLASG.

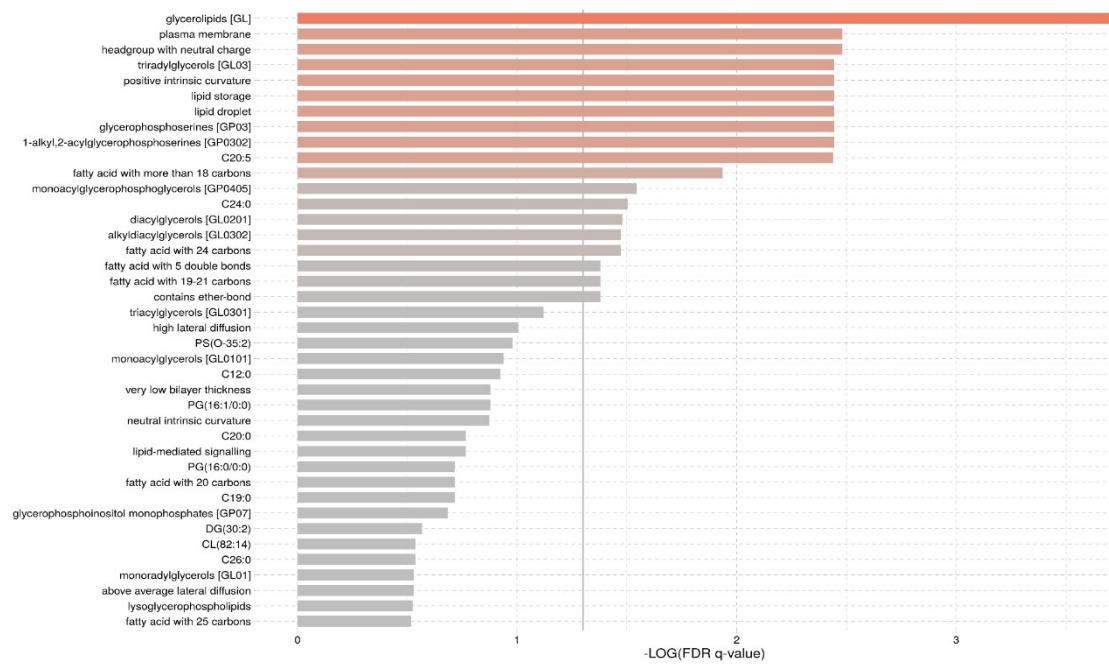

**Fig. S7** The enrichment analysis for the lipidome data in TPLASG calculated from the LION website.



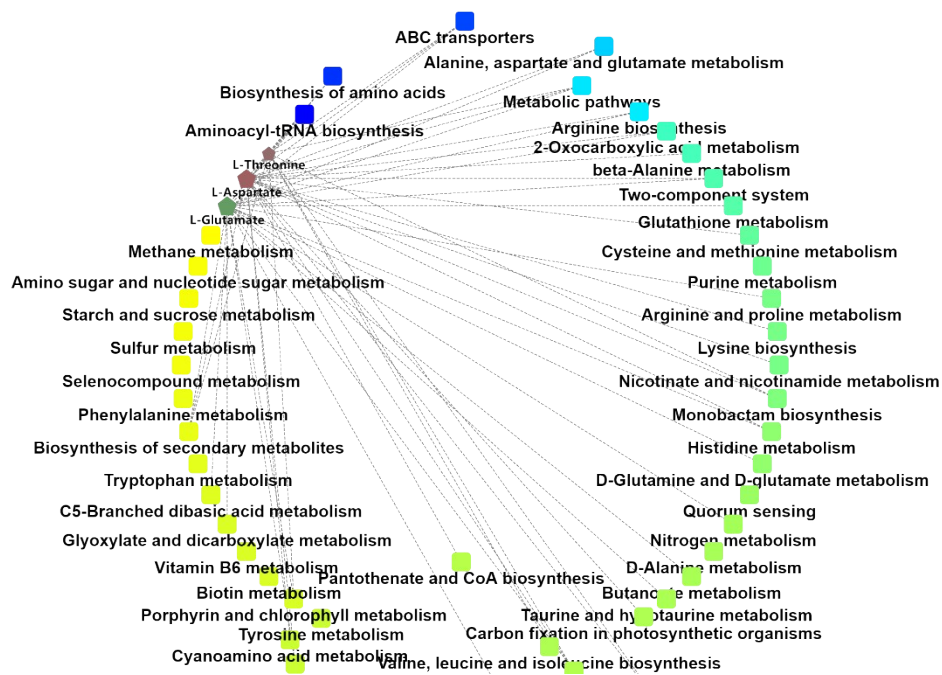

Fig. S8 The graph of protein-protein interaction in strain TPLA.

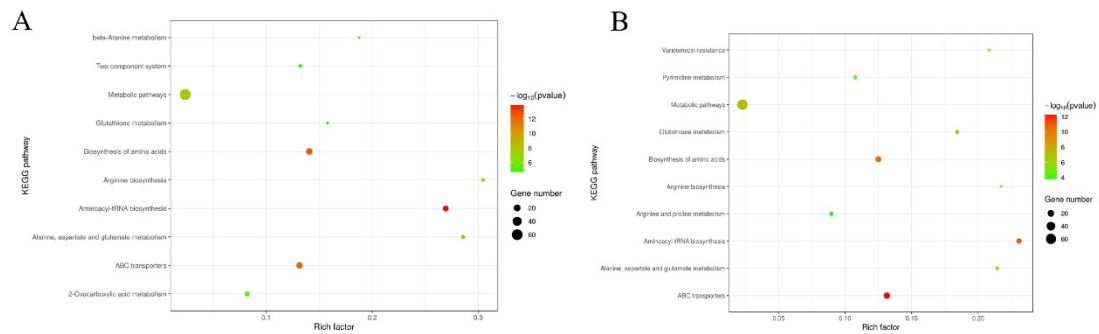

Fig. S9 Distribution of the enriched KEGG pathway. (A) Distribution of the enriched KEGG pathway in strain TPLA compared with strain T7942. (B) Distribution of the enriched KEGG pathway in strain TPLASG compared with strain TPLA.

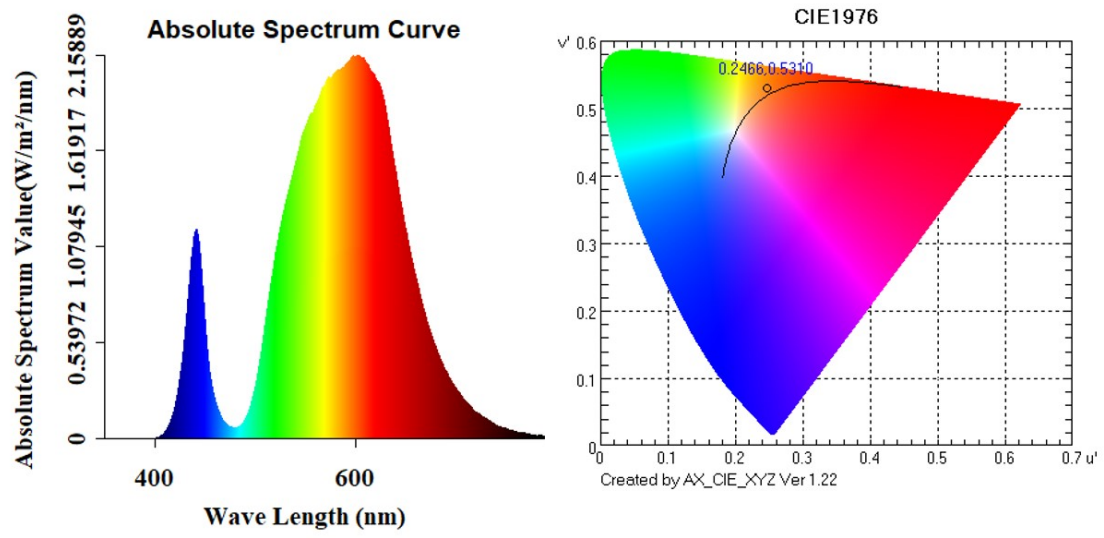

Fig. S10 The absolute spectrum curve data by our photobioreactor.

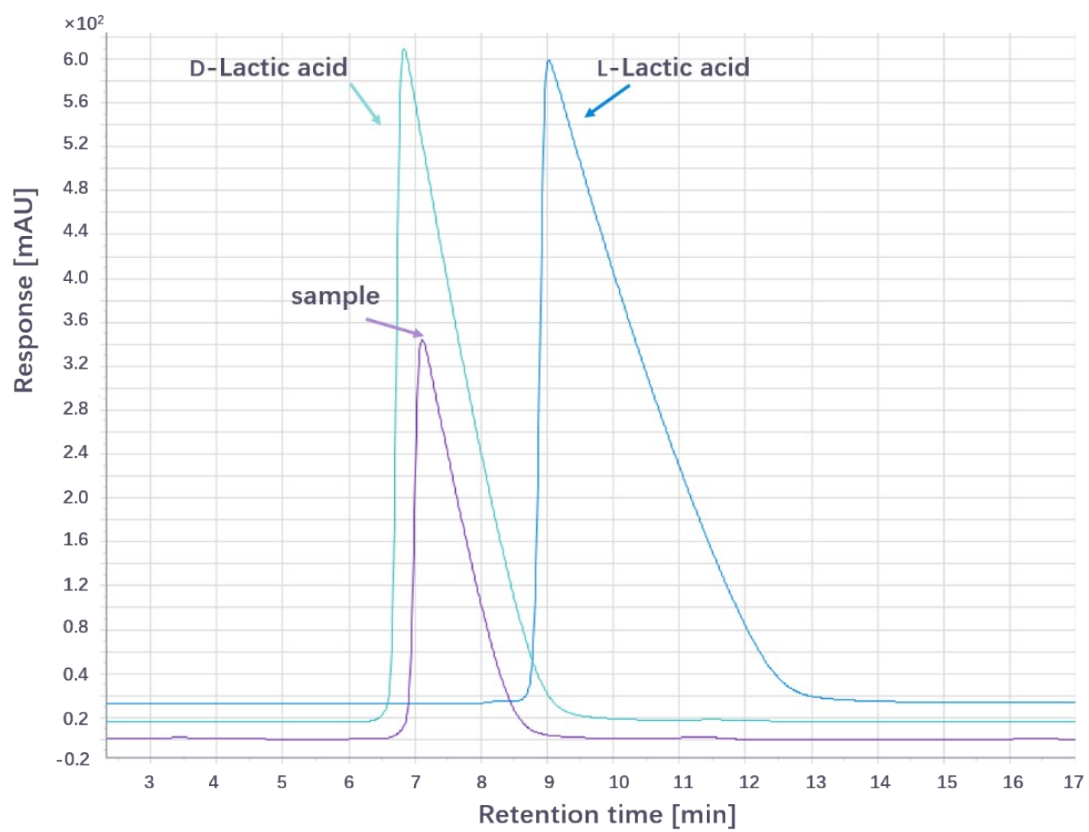

Fig. S11 The analysis of the stereoisomers of lactic acid produced by the engineered cyanobacterial strain PYLW07.

Table S1. Strains used in this study.

| Strain                                 | Description                                                                                                                                                                                                                                                        | Source     |
|----------------------------------------|--------------------------------------------------------------------------------------------------------------------------------------------------------------------------------------------------------------------------------------------------------------------|------------|
| <i>E. coli</i> DH5                     | Cloning host                                                                                                                                                                                                                                                       | Invitroge  |
| <i>Synechococcus elongatus</i> PCC7942 | Wild type                                                                                                                                                                                                                                                          | ATCC 33912 |
| PWLW01                                 | PCC7942 with <i>ldhD</i> , <i>pct</i> and <i>pha</i> integrated at NSI                                                                                                                                                                                             | This study |
| PYLW02                                 | PYLW01 with P <sub>trc</sub> promoter targeting <i>pct</i> and <i>pha</i> gene integrated at NSI                                                                                                                                                                   | This study |
| PYLW03                                 | PYLW01 with P <sub>psbA</sub> promoter targeting <i>pct</i> and <i>pha</i> gene integrated at NSI                                                                                                                                                                  | This study |
| PYLW04                                 | PYLW01 with P <sub>cpc560</sub> promoter targeting <i>pct</i> and <i>pha</i> gene integrated at NSI                                                                                                                                                                | This study |
| PYLW05                                 | PYLW02 with <i>acsA</i> integrated at NSIII                                                                                                                                                                                                                        | This study |
| PYLW06                                 | PYLW05::P <sub>psbA</sub> - <i>asacka-micC</i> -TrbcL-P <sub>th</sub> -riboswitch- <i>hfq</i> -TrbcL integrated at NSIII                                                                                                                                           | This study |
| PYLW07                                 | PYLW06::P <sub>psbA</sub> - <i>asacka-micC</i> -TrbcL-P <sub>psbA</sub> - <i>asaccC-micC</i> -TrbcL-P <sub>psbA</sub> - <i>asfabF-micC</i> -TrbcL-P <sub>psbA</sub> - <i>asfabH-micC</i> -TrbcL-P <sub>th</sub> -riboswitch- <i>hfq</i> -TrbcL integrated at NSIII | This study |

Table S2. Plasmids used in this study.

| Plasmid                                                          | Description                                                                                                                                                                                                                                                                                  | Source         |
|------------------------------------------------------------------|----------------------------------------------------------------------------------------------------------------------------------------------------------------------------------------------------------------------------------------------------------------------------------------------|----------------|
| pEASY-Blunt                                                      | f1 ori, T7 promoter, Kan <sup>R</sup> and Amp <sup>R</sup>                                                                                                                                                                                                                                   | Transgen       |
| PAM2991                                                          | ColE1, trc promoter, NSI targeting, Spec <sup>R</sup>                                                                                                                                                                                                                                        | Stored in lab  |
| <i>ldhD</i> /pAM                                                 | pAM2991 contained the <i>ldhD</i> gene                                                                                                                                                                                                                                                       | This study     |
| <i>ldhD-pct</i> /pAM                                             | pAM2991 contained the <i>ldhD</i> and <i>pct</i> gene                                                                                                                                                                                                                                        | This study     |
| <i>ldhD-pct-pha</i> /pAM                                         | pAM2991 contained the <i>ldhD</i> and <i>pct</i> gene                                                                                                                                                                                                                                        | This study     |
| pBA3031M                                                         | pBA3031M vector for expressing sRNAs,<br>Kan <sup>R</sup> in WT                                                                                                                                                                                                                              | Dr.TaoSun<br>1 |
| <i>asackA</i> /sRNA                                              | pBA3031M::P <sub>psbA</sub> - <i>asackA-micC</i> -TrbcL-P <sub>th</sub> -<br>riboswitch- <i>hfq</i> -TrbcL; Kan <sup>R</sup> in WT                                                                                                                                                           | This study     |
| <i>asackA</i> -<br><i>asaccC</i> /sRNA                           | pBA3031M::P <sub>psbA</sub> - <i>asackA-micC</i> -TrbcL-<br>P <sub>psbA</sub> - <i>asaccC-micC</i> -TrbcL P <sub>th</sub> -riboswitch- <i>hfq</i> -<br>TrbcL; Kan <sup>R</sup> in WT                                                                                                         | This study     |
| <i>asackA-asaccC</i> -<br><i>asfabF</i> //sRNA                   | pBA3031M::P <sub>psbA</sub> - <i>asackA-micC</i> -TrbcL-<br>P <sub>psbA</sub> - <i>asaccC-micC</i> -TrbcL-P <sub>psbA</sub> - <i>asfabF</i> -<br><i>micC</i> -TrbcL-P <sub>th</sub> -riboswitch- <i>hfq</i> -TrbcL; Kan <sup>R</sup><br>in WT                                                | This study     |
| <i>asackA-asaccC</i> -<br><i>asfabF</i> -<br><i>asfabH</i> /sRNA | pBA3031M::P <sub>psbA</sub> - <i>asackA-micC</i> -TrbcL-<br>P <sub>psbA</sub> - <i>asaccC-micC</i> -TrbcL-P <sub>psbA</sub> - <i>a-fabF</i> -<br><i>micC</i> -TrbcL-P <sub>psbA</sub> - <i>asfabH-micC</i> -TrbcL-P <sub>th</sub> -<br>riboswitch- <i>hfq</i> -TrbcL; Kan <sup>R</sup> in WT | This study     |

Table S3. DNA sequences of the primers used in this study.

| Name           | Sequence(5'-3')                                                                                          |
|----------------|----------------------------------------------------------------------------------------------------------|
| <i>ldhD</i> -F | CATGGAATTCATGACTAAAATTTTGCTTACGCAA                                                                       |
| <i>ldhD</i> -R | CATGCTTAAGTTAGCCAACCTTAACGGGAGTTTC                                                                       |
| <i>pct</i> -F  | CATGCTCGAGGAACCCCTCTTTATAAACGCTACC                                                                       |
| <i>pct</i> -R  | CATGGGATCCGGTAGTTGTTACCCAGTAGTTC                                                                         |
| <i>pha</i> -F  | CATGGGATCCGAAGATATCGTGGAACCTGGTG                                                                         |
| <i>pha</i> -R  | CATGGGATCCATCACTTTGCCATCCTCTATC                                                                          |
| <i>accC</i> -F | GATCAGGATCTTGTTGAAACGCATTTTCTGTTGGGCCATTGC                                                               |
| <i>accC</i> -R | ATGCGTTTCAACAAGATCCTGATCATGTATTTGTCGATGTTTCAGATT                                                         |
| <i>fabF</i> -F | G                                                                                                        |
| <i>fabF</i> -R | ACGCTGGCGTCCGGTTTCAGTCATTTTCTGTTGGGCCATTGC                                                               |
| <i>fabH</i> -F | ATGACTGAAACCGGACGCCAGCGTATGTATTTGTCGATGTTTCAGATT                                                         |
| <i>fabH</i> -R | G<br>GTTGAGGCTGCCATCACTGCGCATTTTCTGTTGGGCCATTGC<br>ATGCGCAGTGATGGCAGCCTCAACATGTATTTGTCGATGTTTCAGATT<br>G |
| pAM-F          | ATCTGGTTTGACAGCTTATCAT                                                                                   |
| pAM-R          | TCTGTATCAGGCTGAAAATCTTCT                                                                                 |
| YLW-F          | ATCCGCCAAAACAGCCAAG                                                                                      |
| YLW-R          | CCGGCCAGCCTCGCAGAG                                                                                       |
| sRA-F          | TGCGAAGTGATCTTCCGT                                                                                       |
| sRA-R          | AGGGACTCTTCTCTACAGGT                                                                                     |
| acsA-F         | AGACCGAGCGTTCTGAACAACGACTGCACGGTGCACCAA                                                                  |
| acsA-F         | TCGATCGTTGGCTGGCTCATGAATTCCATGGTCTGTTCCCTGTG                                                             |
| AcA-F          | TTGCAACTACTAACCTTCAATGCA                                                                                 |
| AcA-R          | TCAATTGAAAGACTGTGGGG                                                                                     |

Underlining indicates restriction enzyme cleavage sites corresponding to the primer description.

Table S4. Comparison of trace minerals of intracellular extract and the remaining medium after fermentation in BG11 medium and modified BG11 medium.

| Sample       | Trace minerals (ppm) |             |             |             |             |             |
|--------------|----------------------|-------------|-------------|-------------|-------------|-------------|
|              | B                    | Mn          | Zn          | Mo          | Cu          | Co          |
| IE-BG11(5×)  | 0.375493876          | 0.027609927 | 0.021589774 | 0.000952725 | 0.016059076 | 0.005154796 |
| IE-MBG11(5×) | 0.397327113          | 0.029237651 | 0.078601708 | 0.004269637 | 0.026723837 | 0.008417892 |
| BG11(50×)    | 0.372294111          | 0.011474452 | 0.010054592 | 0.006665369 | 0.001078022 | 0.000778925 |
| MBG11(50×)   | 0.387541232          | 0.024391152 | 0.041404961 | 0.024369408 | 0.001074729 | 0.001717891 |

IE=intracellular extract; MBG11= modified BG11 medium.



Table S5. E<sup>+</sup>-factors determined for the process of production of polylactic acid cultivated with the photobioreactor.

| Energy source | E <sup>+</sup> -factor <sup>a</sup> [kg kg <sup>-1</sup> ] × 10 <sup>-3</sup> |
|---------------|-------------------------------------------------------------------------------|
| Solar light   | -0.54                                                                         |
| Clean energy  | -0.35 ~ 0.11                                                                  |
| Fossil fuel   | 3.67 ~ 5.39 <sup>b</sup> / or 16.4 ~ 21.2 <sup>c</sup>                        |

<sup>a</sup>The E<sup>+</sup>-factor furthermore takes energy demand and the resulting CO<sub>2</sub> emission during enzyme production and purification into account<sup>2</sup>.

$$E^+ = \frac{\sum m(\text{wastes}) \text{ kg}}{m(\text{products}) \text{ kg}} + \frac{W \times CI}{m(\text{product})} \left[ \frac{\text{kWh} \times \frac{\text{kg}(\text{CO}_2)}{\text{kWh}}}{\text{kg}} \right] \quad (1)$$

Eq. (1). The E<sup>+</sup>-factor. W=electrical power used; CI=carbon intensity. i. e. the local average CO<sub>2</sub> emissions caused for the generation of electricity.

<sup>b</sup> The CI data from the Michaja et al<sup>3</sup>.

<sup>c</sup> The CI data from OECD average (2015) and European Union average<sup>4</sup>.

Clean energy: nuclear, wind, and solar power.

The detailed calculation process: Every *x*mol of polylactic acid monomer (89 g/mol, Mw) generated accompanying *x*mol CO<sub>2</sub> (44 g/mol, Mw) consumption when directly using solar light or the light derived from electricity during eight days of fermentation using the 25 W purple LED. Take European Union for example, still roughly 50% of the electricity is obtained this way, resulting in CO<sub>2</sub> emissions of 315 g per kWh in 2015<sup>4</sup>.

Table S6. The recovery rates of polylactic acid (PLA) in different solvents. All data are averages of three independent experiments.

| Solvent            | Recovery rate of PLA |
|--------------------|----------------------|
| chloroform         | 87.7% $\pm$ 2.5%     |
| MeTHF              | 82.3% $\pm$ 0.8%     |
| ethylene carbonate | 80.3% $\pm$ 3.2%     |
| acetone            | 77.6% $\pm$ 1.4%     |
| ethyl acetate      | 76.7% $\pm$ 2.3%     |

MeTHF:2-methyl tetrahydrofuran

### References

1. T. Sun, S. Li, X. Song, G. Pei, J. Diao, J. Cui, M. Shi, L. Chen and W. Zhang, *Biotechnol. Biofuels*, 2018, **11**, 26.
2. F. Tieves, F. Tonin, E. Fernández-Fueyo, J. M. Robbins, B. Bommarius, A. S. Bommarius, M. Alcalde and F. Hollmann, *Tetrahedron*, 2019, **75**, 1311–1314.
3. M. Pehl, A. Arvesen, F. Humpenoder, A. Popp, E. G. Hertwich and G. Luderer, *Nat. Energy*, 2017, **2**, 939–945.
4. International Energy Agency: 'CO<sub>2</sub> emissions from fuel combustion' Agency, <https://dx.doi.org/10.1787/co2-data-en>, accessed 12.12.2018.
